# Supplementary material for: CRISPR-Pass: Gene Rescue of Nonsense Mutations Using Adenine Base Editors
Source: PubMed Central journal article supplement — Mol Ther. 2019 May 24;27(8):1364–71. doi: 10.1016/j.ymthe.2019.05.013 (PMC6698196; doi:10.1016/j.ymthe.2019.05.013), 2019-05-24
Supplement: mmc1.pdf [file mmc1.pdf]

**YMTHE, Volume 27**

## **Supplemental Information**

### **CRISPR-Pass: Gene Rescue of Nonsense**

### **Mutations Using Adenine Base Editors**

**Choongil Lee, Dong Hyun Jo, Gue-Ho Hwang, Jihyeon Yu, Jin Hyoung Kim, Se-eun Park, Jin-Soo Kim, Jeong Hun Kim, and Sangsu Bae**

## Supplementary Information

### CRISPR-pass: Gene rescue of nonsense mutations using adenine base editors

Choongil Lee, Dong Hyun Jo, Gue-Ho Hwang, Jihyeon Yu, Jin Hyoung Kim, Se-eun Park, Jin-Soo Kim, Jeong Hun Kim and Sangsu Bae

#### Content:

**Supplementary Figure 1.** Coding or noncoding targeting depends on the *EGFP* sequence and the PTC position.

**Supplementary Figure 2.** Rescued EGFP expression after treatment with ABEs.

**Supplementary Figure 3.** Flow cytometry results

**Supplementary Figure 4.** CRISPR-pass for XPC patient-derived fibroblasts.

**Supplementary Figure 5.** Prolonged expression of the XPC protein after ABE treatment.

**Supplementary Figure 6.** Off-target analysis for CRISPR-pass targeting XPC.

**Supplementary Table 1.** Flow cytometry results.

**Supplementary Table 2.** NGS results.

**Supplementary Table 3.** A-to-G substitution rates (%) in potential ABE off-target sites.

**Supplementary Table 4.** List of oligomers encoding sgRNAs.

**Supplementary Table 5.** PCR primers used in this study.

**Supplementary Table 6.** List of off-target sites.

**Supplementary Figure 1. Coding or noncoding targeting depends on the *EGFP* sequence and the PTC position.** The sequence of the *EGFP* gene is shown. ABE target sequences are underlined. Depending on the target strand, codons for Lys53 or Asn213 were mutated such that they became STOP codons. The codons that are mutated are shown in blue and the PAM sequences are shown in red.

EGFP-PTCs-knockin DNA sequences

```

1 atggtgagcaagggcgaggagctgttcaccgggggtggtgcccatcctggtcgagctggacggcgacgtaaacggcca
78 caagttcagcgtgtccggcgagggcgagggcgatgccacctacggcaagctgaccctgaagttcatctgcaccaccg
   coding strand target sgRNA (53rd Lysine -> STOP)
   ↓
155 gcaagctgcccgtgccctggccaccctcgtgaccaccctgacctacggcgtgcagtgcttcagccgctaccccgac
232 cacatgaagcagcagcacttcttcaagtcgcatgccgaaggctacgtccaggagcgcaccatcttcttcaagga
309 cgacggcaactacaagaccgcccgcgaggtgaagttcgagggcgacaccctggtgaaccgcatcgagctgaagggca
386 tcgacttcaaggaggacggcaacatcctggggcacaagctggagtacaactacaacagccacaacgtctatatcatg
463 gccgacaagcagaagaacggcatcaaggtgaacttcaagatccgccacaacatcgaggacggcagcgtgcagctcgc
540 cgaccactaccagcagaacacccccatcggcgacggccccgtgctgctgcccgacaaccactacctgagcaccagt
   noncoding strand target sgRNA (213th Asparagine-> STOP)
   ↓
617 ccgccctgagcaaagaccccaacgagaagcgcgatcacatgggtcctgctggagtctcgtgaccgccgcccggatcact
694 ctcgcatggacgagctgtacaagtga

```

**Supplementary Figure 2. Rescued EGFP expression after treatment with ABEs.** Rescued EGFP expression in EGFP-PTC-KI cell lines in which the coding strand (a) or noncoding strand (b) is targeted for PTC bypass. All scale bars are 100  $\mu$ m.

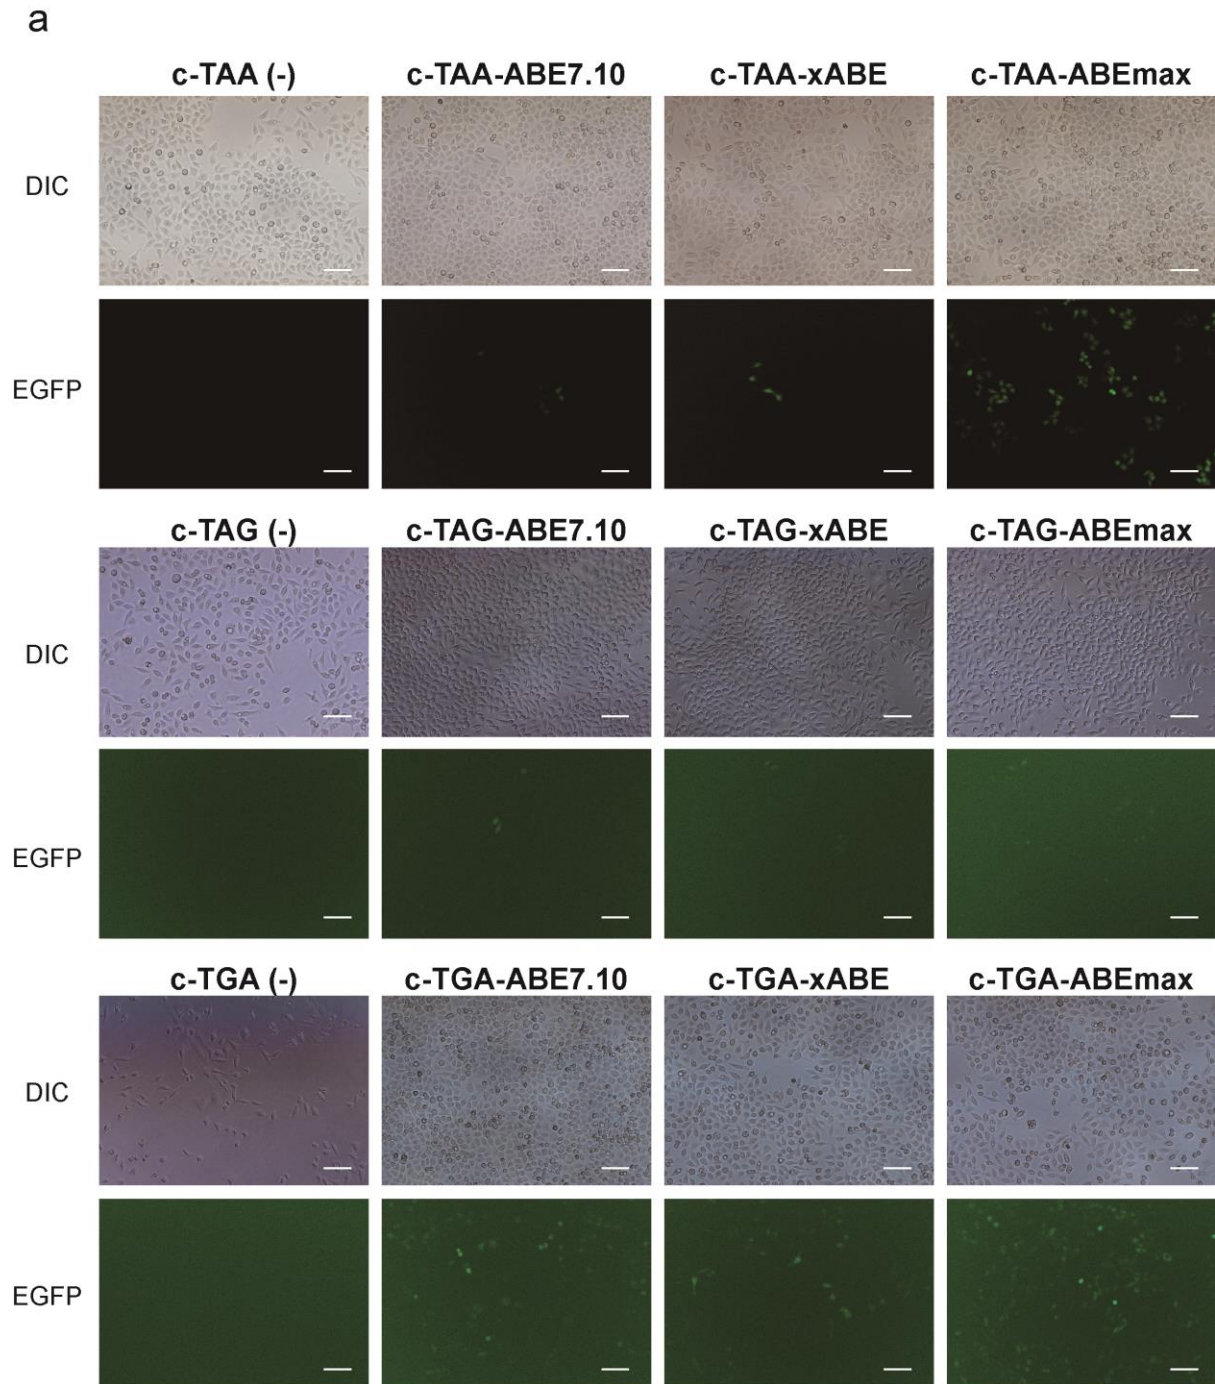

b

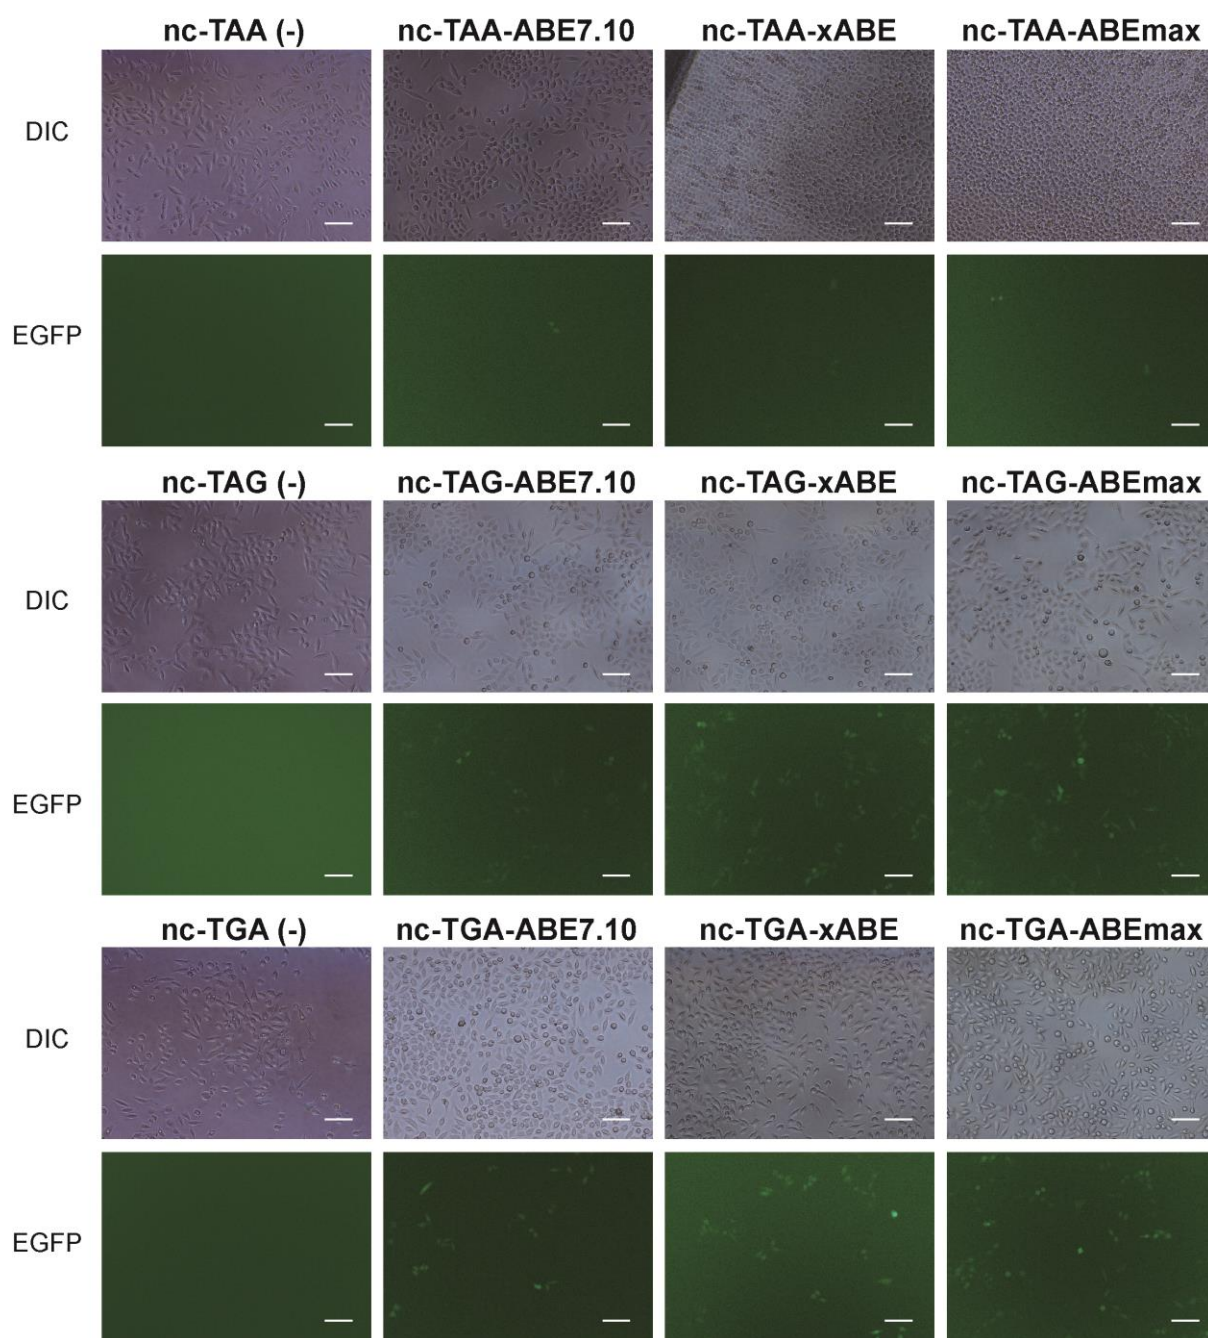

### Supplementary Figure 3. Flow cytometry results.

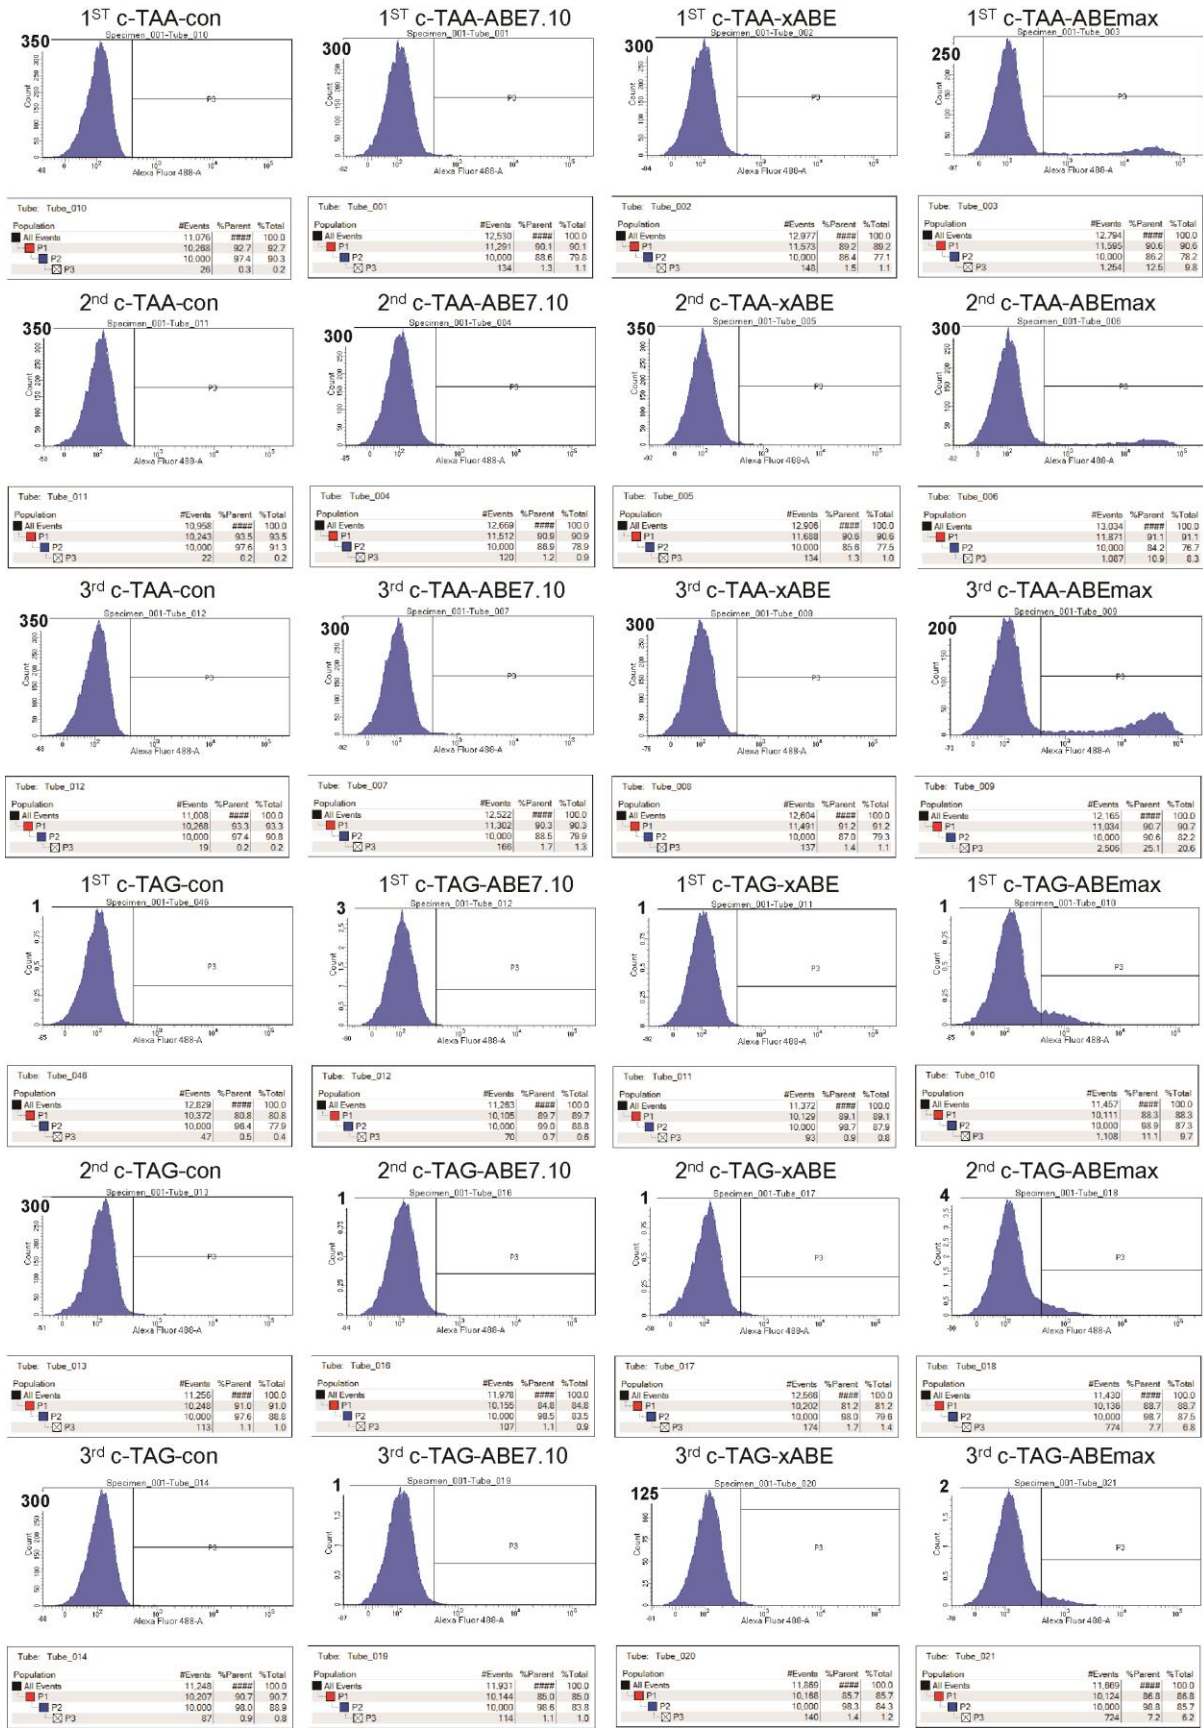

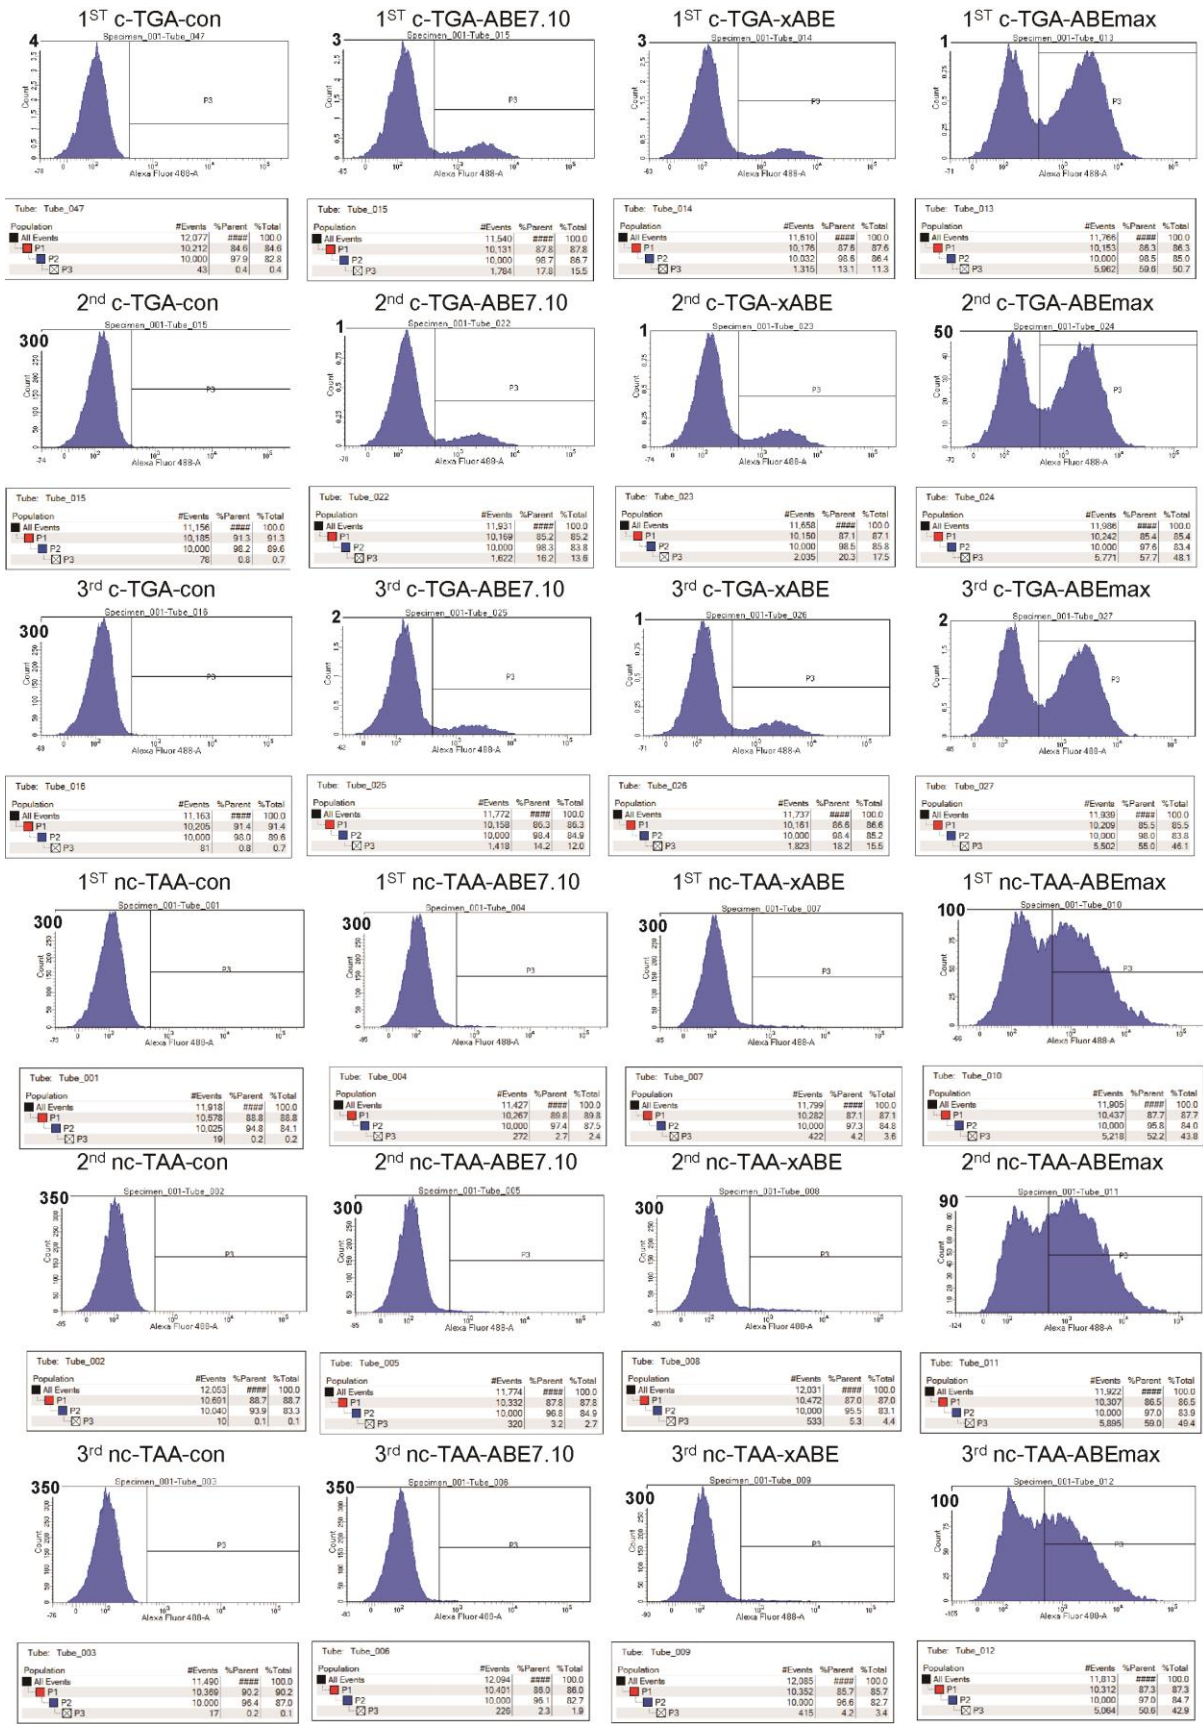

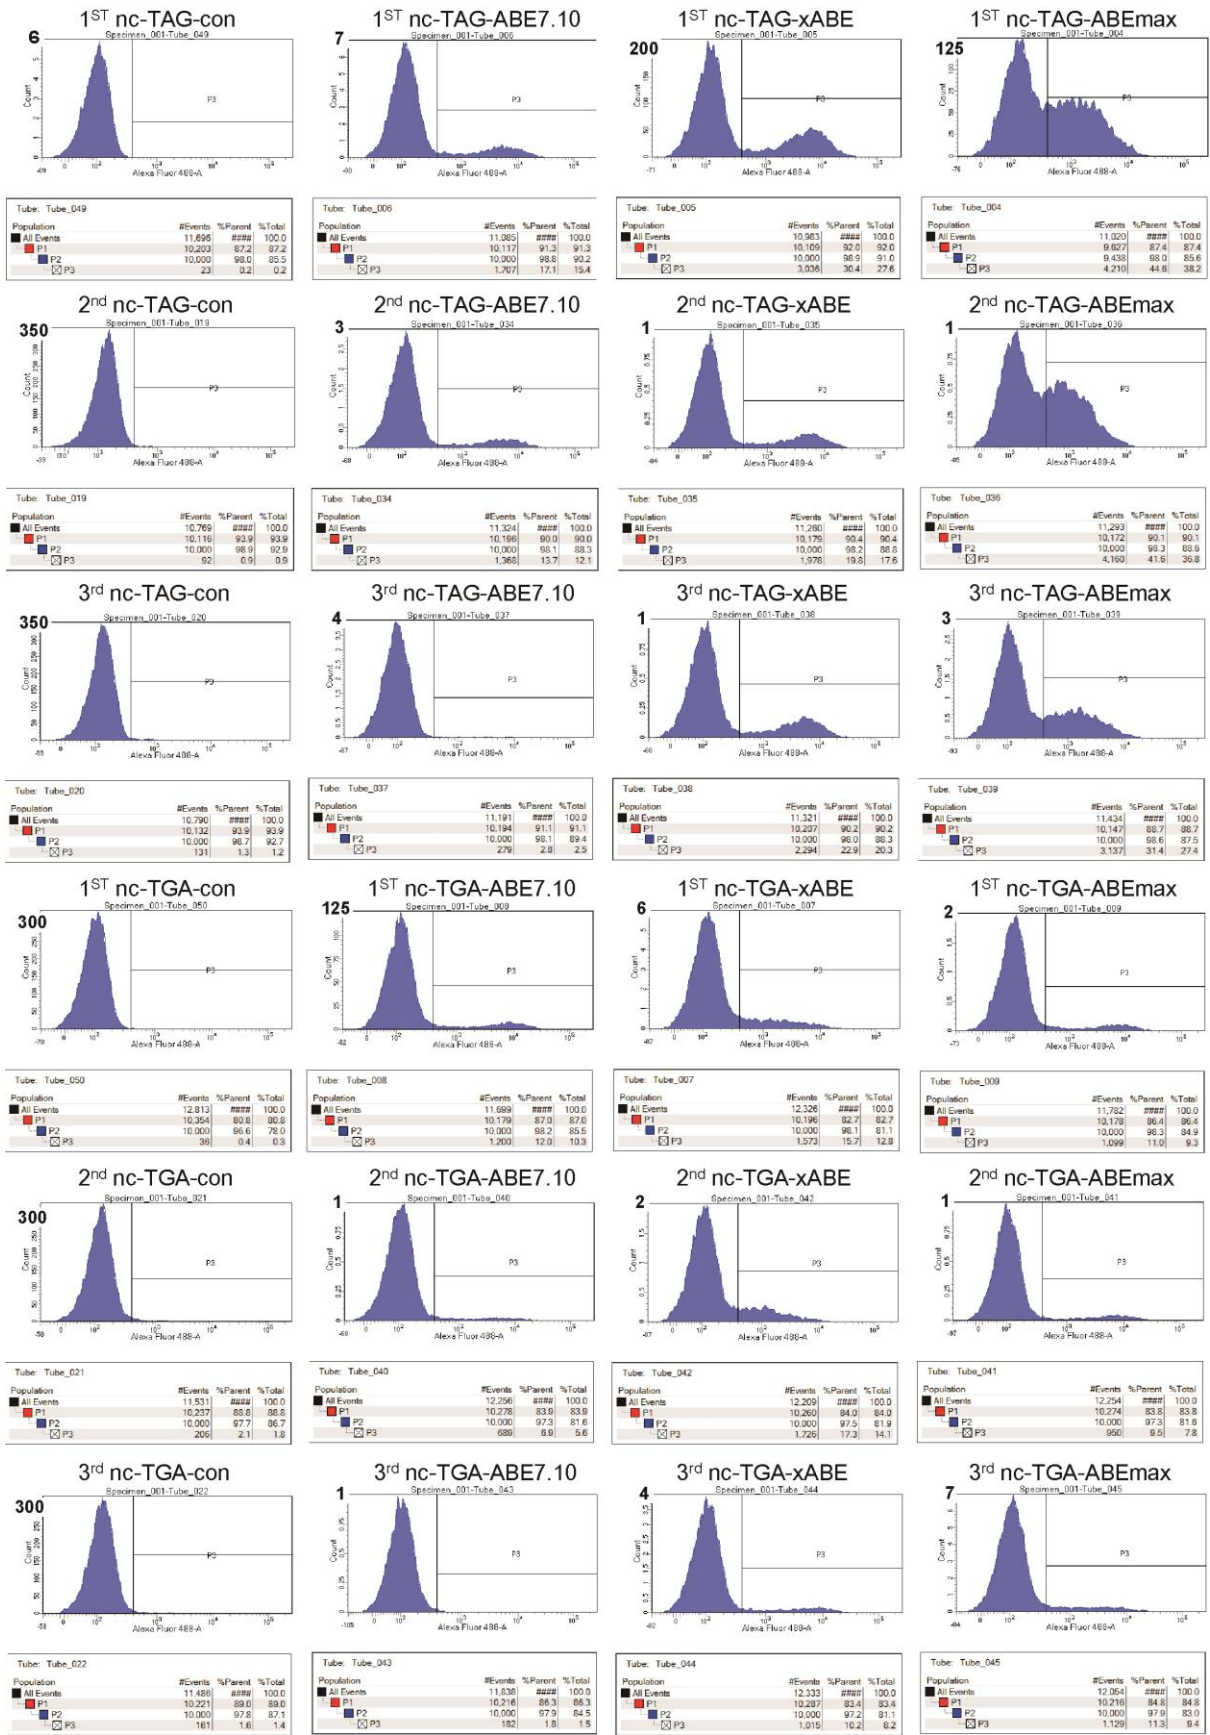



**Supplementary Figure 4. CRISPR-pass for XPC patient-derived fibroblasts.** Next generation sequencing (NGS) results from (a) untreated GM14867 fibroblasts, (b) ABE7.10-treated GM143867 fibroblasts, and (c) xABE-treated GM143867 fibroblasts. (d) Image of complete SDS-PAGE gel that is shown in part in Figure 3c.

**a**

XPC\_wt

|   | Trp  |      |      | Val  |     |      | STOP |      |     | Asp  |      |      | Val  |      |      | Thr  |      |     | Gln  |     |     | Arg  |      |  |
|---|------|------|------|------|-----|------|------|------|-----|------|------|------|------|------|------|------|------|-----|------|-----|-----|------|------|--|
|   | G    | G    | G    | T    | C   | T    | G    | A    | G   | A    | T    | G    | T    | C    | A    | C    | A    | C   | A    | G   | A   | G    | G    |  |
| A | 0.1  | 0.1  | 0.1  | 0.0  | 0.0 | 0.0  | 0.0  | 99.7 | 0.0 | 99.7 | 0.0  | 0.1  | 0.0  | 0.0  | 99.7 | 0.0  | 99.8 | 0.0 | 99.8 | 0.0 | 0.0 | 0.0  | 0.0  |  |
| T | 0.0  | 0.0  | 0.0  | 99.6 | 0.0 | 99.8 | 0.0  | 0.0  | 0.0 | 0.0  | 99.7 | 0.0  | 99.6 | 0.1  | 0.0  | 0.1  | 0.0  | 0.0 | 0.0  | 0.0 | 0.0 | 0.0  | 0.0  |  |
| G | 99.9 | 99.9 | 99.9 | 0.1  | 0.0 | 0.0  | 100  | 0.2  | 100 | 0.2  | 0.0  | 99.9 | 0.0  | 0.0  | 0.2  | 0.0  | 0.2  | 0.0 | 0.2  | 100 | 0.3 | 99.9 | 99.9 |  |
| C | 0.0  | 0.0  | 0.0  | 0.3  | 100 | 0.2  | 0.0  | 0.0  | 0.0 | 0.0  | 0.3  | 0.0  | 0.4  | 99.9 | 0.0  | 99.9 | 0.0  | 100 | 0.0  | 0.0 | 0.0 | 0.0  | 0.0  |  |

**b**

XPC\_ABE7.10

|   | Trp  |      |      | Val  |      |      | STOP |      |      | Asp  |      |      | Val  |      |      | Thr  |      |      | Gln  |      |      | Arg  |      |  |
|---|------|------|------|------|------|------|------|------|------|------|------|------|------|------|------|------|------|------|------|------|------|------|------|--|
|   | G    | G    | G    | T    | C    | T    | G    | A    | G    | A    | T    | G    | T    | C    | A    | C    | A    | C    | A    | G    | A    | G    | G    |  |
| A | 0.1  | 0.1  | 0.1  | 0.0  | 0.0  | 0.0  | 0.1  | 96.5 | 0.1  | 99.3 | 0.0  | 0.0  | 0.0  | 0.0  | 99.6 | 0.0  | 99.7 | 0.0  | 99.8 | 0.0  | 99.7 | 0.1  | 0.1  |  |
| T | 0.0  | 0.0  | 0.0  | 99.5 | 0.4  | 99.8 | 0.0  | 0.1  | 0.0  | 0.0  | 99.7 | 0.0  | 99.5 | 0.1  | 0.0  | 0.0  | 0.0  | 0.1  | 0.0  | 0.0  | 0.0  | 0.0  | 0.0  |  |
| G | 99.9 | 99.9 | 99.9 | 0.0  | 0.0  | 0.0  | 99.9 | 3.4  | 99.9 | 0.7  | 0.0  | 99.9 | 0.0  | 0.0  | 0.3  | 0.0  | 0.3  | 0.0  | 0.2  | 99.9 | 0.3  | 99.9 | 99.9 |  |
| C | 0.0  | 0.0  | 0.0  | 0.4  | 99.6 | 0.2  | 0.0  | 0.0  | 0.0  | 0.0  | 0.3  | 0.0  | 0.4  | 99.9 | 0.0  | 99.9 | 0.0  | 99.9 | 0.0  | 0.0  | 0.0  | 0.0  | 0.0  |  |

**c**

XPC\_xABE

|   | Trp  |      |      | Val  |      |      | STOP |      |      | Asp  |      |      | Val  |      |      | Thr  |      |      | Gln  |     |      | Arg  |      |  |
|---|------|------|------|------|------|------|------|------|------|------|------|------|------|------|------|------|------|------|------|-----|------|------|------|--|
|   | G    | G    | G    | T    | C    | T    | G    | A    | G    | A    | T    | G    | T    | C    | A    | C    | A    | C    | A    | G   | A    | G    | G    |  |
| A | 0.1  | 0.1  | 0.1  | 0.0  | 0.0  | 0.0  | 0.0  | 86.2 | 0.0  | 99.3 | 0.0  | 0.0  | 0.0  | 0.0  | 99.7 | 0.0  | 99.7 | 0.0  | 99.8 | 0.0 | 99.6 | 0.1  | 0.1  |  |
| T | 0.0  | 0.0  | 0.0  | 99.5 | 0.7  | 99.7 | 0.0  | 0.1  | 0.0  | 0.0  | 99.7 | 0.0  | 99.5 | 0.0  | 0.0  | 0.1  | 0.0  | 0.1  | 0.0  | 0.0 | 0.1  | 0.0  | 0.0  |  |
| G | 99.9 | 99.9 | 99.9 | 0.0  | 0.1  | 0.0  | 99.9 | 13.7 | 99.9 | 0.7  | 0.0  | 99.9 | 0.0  | 0.0  | 0.3  | 0.0  | 0.2  | 0.0  | 0.2  | 100 | 0.4  | 99.9 | 99.9 |  |
| C | 0.0  | 0.0  | 0.0  | 0.4  | 99.2 | 0.2  | 0.0  | 0.0  | 0.0  | 0.0  | 0.2  | 0.0  | 0.5  | 99.9 | 0.0  | 99.9 | 0.0  | 99.9 | 0.0  | 0.0 | 0.0  | 0.0  | 0.0  |  |

**d**

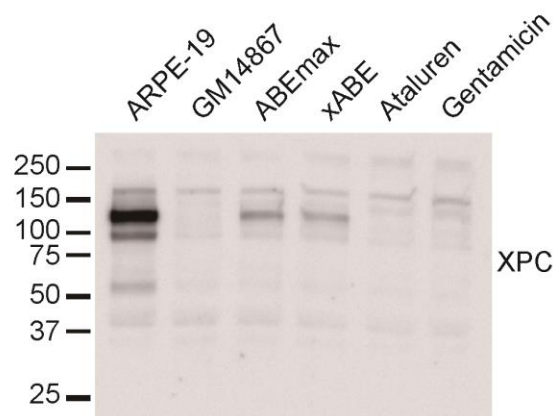

**Supplementary Figure 5. Prolonged expression of the XPC protein after ABE treatment.** Image of complete SDS-PAGE gel that is shown in part in Figure 3e.

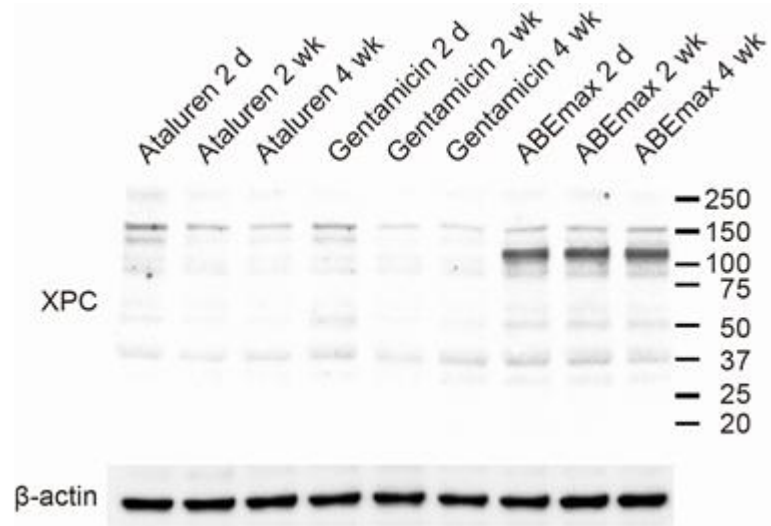

**Supplementary Figure 6. Off-target analysis for CRISPR-pass targeting XPC.** A to G substitution rates at off-target sites are displayed. The percentages of substitutions at each site are summarized in Supplementary Table 3. The red bars depict A to G substitution rates in untreated samples, whereas the blue bars depict A to G substitution rates in ABE-treated samples. Blue arrowhead indicates a target “A” which shows the A to G substitution rates (%).

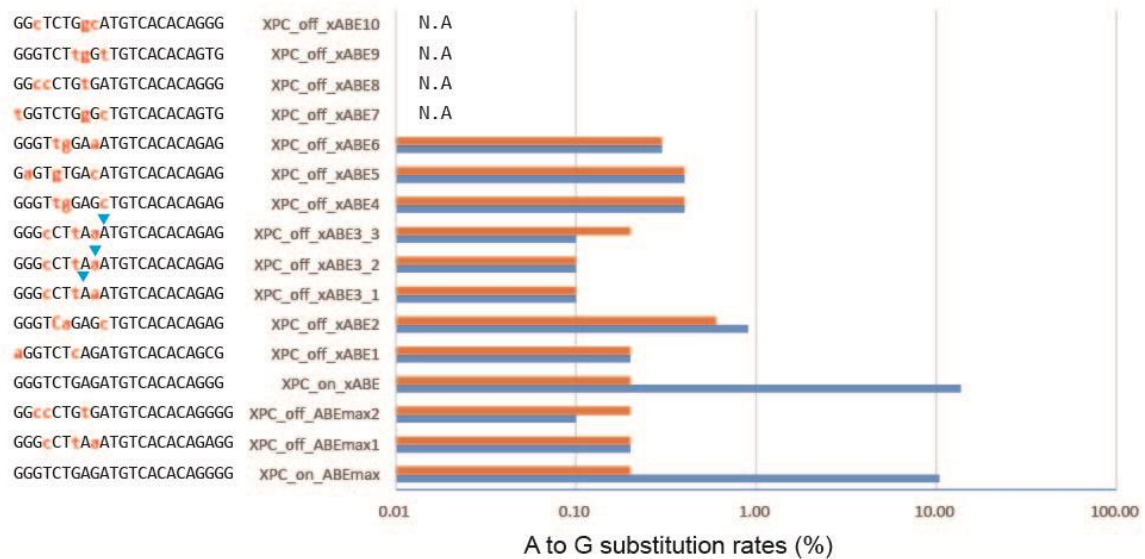

**Supplementary Table 1. Flow cytometry results.** The percentages of EGFP (+) cells in populations of ABE-treated EGFP-PTC-KI cells. Each experiment was repeated 3 times.

|        | (-)                   |                       |                       | ABE7.10               |                       |                       | xABE                  |                       |                       | ABEmax                |                       |                       |
|--------|-----------------------|-----------------------|-----------------------|-----------------------|-----------------------|-----------------------|-----------------------|-----------------------|-----------------------|-----------------------|-----------------------|-----------------------|
|        | 1 <sup>st</sup> trial | 2 <sup>nd</sup> trial | 3 <sup>rd</sup> trial | 1 <sup>st</sup> trial | 2 <sup>nd</sup> trial | 3 <sup>rd</sup> trial | 1 <sup>st</sup> trial | 2 <sup>nd</sup> trial | 3 <sup>rd</sup> trial | 1 <sup>st</sup> trial | 2 <sup>nd</sup> trial | 3 <sup>rd</sup> trial |
| c-TAA  | 0.3%                  | 0.2%                  | 0.2%                  | 1.3%                  | 1.2%                  | 1.7%                  | 1.5%                  | 1.3%                  | 1.4%                  | 12.5%                 | 10.9%                 | 25.1%                 |
| c-TAG  | 0.5%                  | 1.1%                  | 0.9%                  | 0.7%                  | 1.1%                  | 1.1%                  | 0.9%                  | 1.7%                  | 1.4%                  | 11.1%                 | 7.7%                  | 7.2%                  |
| c-TGA  | 0.4%                  | 0.8%                  | 0.8%                  | 17.8%                 | 16.2%                 | 14.2%                 | 13.1%                 | 20.3%                 | 18.2%                 | 59.6%                 | 57.7%                 | 55.0%                 |
| nc-TAA | 0.2%                  | 0.1%                  | 0.2%                  | 2.7%                  | 3.2%                  | 2.3%                  | 4.2%                  | 5.3%                  | 4.2%                  | 52.2%                 | 59.0%                 | 50.6%                 |
| nc-TAG | 0.2%                  | 0.9%                  | 1.3%                  | 17.1%                 | 13.7%                 | 2.8%                  | 30.4%                 | 19.8%                 | 22.9%                 | 44.6%                 | 41.6%                 | 31.4%                 |
| nc-TGA | 0.4%                  | 2.1%                  | 1.6%                  | 11.0%                 | 6.9%                  | 1.8%                  | 12.0%                 | 9.5%                  | 10.2%                 | 15.7%                 | 17.3%                 | 11.3%                 |

**Supplementary Table 2. NGS results.** The percentages of A to G substitutions in populations of ABE-treated EGFP-PTC-KI cells. Each experiment was repeated 3 times.

|        | (-)                   |                       |                       | ABE7.10               |                       |                       | xABE                  |                       |                       | ABEmax                |                       |                       |
|--------|-----------------------|-----------------------|-----------------------|-----------------------|-----------------------|-----------------------|-----------------------|-----------------------|-----------------------|-----------------------|-----------------------|-----------------------|
|        | 1 <sup>st</sup> trial | 2 <sup>nd</sup> trial | 3 <sup>rd</sup> trial | 1 <sup>st</sup> trial | 2 <sup>nd</sup> trial | 3 <sup>rd</sup> trial | 1 <sup>st</sup> trial | 2 <sup>nd</sup> trial | 3 <sup>rd</sup> trial | 1 <sup>st</sup> trial | 2 <sup>nd</sup> trial | 3 <sup>rd</sup> trial |
| c-TAA  | 0.0%                  | 0.1%                  | 0.0%                  | 0.2%                  | 0.2%                  | 0.0%                  | 0.0%                  | 0.0%                  | 0.9%                  | 11.2%                 | 9.7%                  | 43.5%                 |
| c-TAG  | 0.5%                  | 0.6%                  | 0.4%                  | 5.3%                  | 6.5%                  | 2.7%                  | 9.1%                  | 9.5%                  | 4.0%                  | 51.2%                 | 52.2%                 | 54.1%                 |
| c-TGA  | 0.3%                  | 0.3%                  | 0.0%                  | 6.2%                  | 5.9%                  | 5.4%                  | 5.1%                  | 4.4%                  | 2.4%                  | 37.5%                 | 34.0%                 | 41.3%                 |
| nc-TAA | 0.0%                  | 0.0%                  | 0.0%                  | 6.7%                  | 8.6%                  | 7.2%                  | 11.2%                 | 14.0%                 | 11.8%                 | 80.9%                 | 84.2%                 | 81.6%                 |
| nc-TAG | 0.3%                  | 0.1%                  | 0.2%                  | 12.7%                 | 1.8%                  | 14.3%                 | 16.3%                 | 22.2%                 | 28.7%                 | 41.9%                 | 33.1%                 | 44.8%                 |
| nc-TGA | 0.2%                  | 0.3%                  | 0.4%                  | 9.1%                  | 2.3%                  | 15.2%                 | 15.0%                 | 12.1%                 | 16.0%                 | 37.4%                 | 19.2%                 | 26.9%                 |

**Supplementary Table 3. A-to-G substitution rates (%) in potential ABE off-target sites.**  
 N.A., not available; these sites are a Cas9 or xCas9 off-target site but do not contain an A targetable by ABEs. Blue colored letter means a target “A” which shows the A to G substitution rates (%)

| Name             | Target sequences        | ABE treated | wt    |
|------------------|-------------------------|-------------|-------|
| XPC_ABEmax_on    | GGGTCTGAGATGTCACACAGNGG | 10.40%      | 0.20% |
| XPC_ABEmax_off_1 | GGGcCTtAaATGTCACACAGAGG | 0.20%       | 0.20% |
| XPC_ABEmax_off_2 | GGccCTGtGATGTCACACAGGGG | 0.10%       | 0.20% |
| XPC_xABE_on      | GGGTCTGAGATGTCACACAGNG  | 13.70%      | 0.20% |
| XPC_xABE_off_1   | aGGTCTcAGATGTCACACAGCG  | 0.20%       | 0.20% |
| XPC_xABE_off_2   | GGGTCaGAGcTGTCACACAGAG  | 0.90%       | 0.60% |
| XPC_xABE_off_3_1 | GGGcCTtAaATGTCACACAGAG  | 0.10%       | 0.10% |
| XPC_xABE_off_3_2 | GGGcCTtAaATGTCACACAGAG  | 0.10%       | 0.10% |
| XPC_xABE_off_3_3 | GGGcCTtAaATGTCACACAGAG  | 0.10%       | 0.20% |
| XPC_xABE_off_4   | GGGTtgGAGcTGTCACACAGAG  | 0.40%       | 0.40% |
| XPC_xABE_off_5   | GaGTgTGAcATGTCACACAGAG  | 0.40%       | 0.40% |
| XPC_xABE_off_6   | GGGTtgGAaATGTCACACAGAG  | 0.30%       | 0.30% |
| XPC_xABE_off_7   | tGGTCTGgGcTGTCACACAGTG  | N.A         | N.A   |
| XPC_xABE_off_8   | GGccCTGtGATGTCACACAGGG  | N.A         | N.A   |
| XPC_xABE_off_9   | GGGTCTtgGtTGTCACACAGTG  | N.A         | N.A   |
| XPC_xABE_off_10  | GGcTCTGgcATGTCACACAGGG  | N.A         | N.A   |

**Supplementary Table 4. List of oligomers encoding sgRNAs.**

| Name          | sequences                 |
|---------------|---------------------------|
| psg-nc-TAA-up | CACCGTCTCTTAGGGGTCTTTGCTC |
| psg-nc-TAG-up | CACCGTCTCCTAGGGGTCTTTGCTC |
| psg-nc-TGA-up | CACCGTCTCTCAGGGGTCTTTGCTC |
| psg-nc-TAA-bo | AAACGAGCAAAGACCCCTAAGAGAC |
| psg-nc-TAG-bo | AAACGAGCAAAGACCCCTAGGAGAC |
| psg-nc-TGA-bo | AAACGAGCAAAGACCCCTGAGAGAC |
| psg-c-TAG_1up | CACCGCCGGCTAGCTGCCCGTGCCC |
| psg-c-TAA_2up | CACCGCCGGCTAACTGCCCGTGCCC |
| psg-c-TGA_3up | CACCGCCGGCTGACTGCCCGTGCCC |
| psg-c-TAG_1bo | AAACGGGCACGGGCAGCTAGCCGGC |
| psg-c-TAA_2bo | AAACGGGCACGGGCAGTTAGCCGGC |
| psg-c-TGA_3bo | AAACGGGCACGGGCAGTCAGCCGGC |
| psg-XPC-up    | CACCGGGTCTGAGATGTCACACAG  |
| psg-XPC-bo    | AAACGACACACTGTAGAGACTGGGC |
| psg-AAVS1-up  | CACCGTAAGCAAACCTTAGAGGTTC |
| psg-AAVS1-bo  | AAACCTTGAGATTCCAACGAATC   |

**Supplementary Table 5. PCR primers used in this study.**

| Name               | Sequences                                                |
|--------------------|----------------------------------------------------------|
| EGFP-1stF          | gacatatccacgccctccta                                     |
| EGFP-1stR          | ctgacaattccgtggtgttg                                     |
| EGFP_c_PTC_Deep_F  | ACACTCTTTCCTACACGAC GCTCTCCGATCT acgtaaacggccacaagttc    |
| EGFP_c_PTC_Deep_R  | GTGACTGGAGTTCAGACGTGT GCTCTCCGATCT tcgtccttgaagaagatggtg |
| EGFP_nc_PTC_Deep_F | ACACTCTTTCCTACACGAC GCTCTCCGATCT gaacggcatcaaggtgaact    |
| EGFP_nc_PTC_Deep_R | GTGACTGGAGTTCAGACGTGT GCTCTCCGATCT cttgtacagctcgtccatgc  |
| inf_sacl_Cgo_add_F | GGTCTATATAAGCAGAGCTC TCGTCGACGAGCTCGTTTAGTG              |
| inf_sacl_Cgo_add_R | CTCACCATGGCGGCGAGCTC GGTACCCTGGACACCTGTGG                |
| inf_ccn_n2_TAA_2F  | CTGAGCAAAGACCCCTgagagaagcgcgatcacatgg                    |
| inf_ccn_n2_TAA_1R  | tcaGGGGTCTTTGCTCAGGGCG                                   |
| inf_ccn_n2_TAG_2F  | CTGAGCAAAGACCCCaagagaagcgcgatcacatgg                     |
| inf_ccn_n2_TAG_1R  | ttgGGGGTCTTTGCTCAGGGCG                                   |
| inf_ccn_n2_TGA_2F  | CTGAGCAAAGACCCCcagagaagcgcgatcacatgg                     |
| inf_ccn_n2_TGA_1R  | tcgGGGGTCTTTGCTCAGGGCG                                   |
| inf_go_F1-1        | TGGGAGGTCTATATAAGCAGAGCTCATGGTGAGCAAGGGCGAGG             |
| inf_go_R1-TAG      | CCATGTGCTAGCGCTTCTCGTTGGGGTC                             |
| inf_go_R1-TAA      | CCATGTGTTAGCGCTTCTCGTTGGGGTC                             |
| inf_go_R1-TGA      | CCATGTGTCAGCGCTTCTCGTTGGGGTC                             |
| inf_go_F1-2TAG     | CGAGAAGCGCTAGcacatggtcctgctggagtt                        |
| inf_go_F1-2TAA     | CGAGAAGCGCTAAcacatggtcctgctggagtt                        |
| inf_go_F1-2TGA     | CGAGAAGCGCTGAcacatggtcctgctggagtt                        |
| inf_go_R1-2        | TGAGATGTCTCTGTGCGGCTCACTTGTACAGCTCGTCCATGC               |
| inf_go_R2-1TAG     | CGGGCAGCTAGCCGGTGGTGCAGATGAAC                            |
| inf_go_R2-1TAA     | CGGGCAGTTAGCCGGTGGTGCAGATGAAC                            |
| inf_go_R2-1TGA     | CGGGCAGTCAGCCGGTGGTGCAGATGAAC                            |
| inf_go_F2-2TAG     | CACCACCGGCTAGCTGCCCGTGCCCTGGCCC                          |
| inf_go_F2-2TAA     | CACCACCGGCTAACTGCCCGTGCCCTGGCCC                          |
| inf_go_F2-2TGA     | CACCACCGGCTGACTGCCCGTGCCCTGGCCC                          |



| Name                  | Sequences                                                    |
|-----------------------|--------------------------------------------------------------|
| XPC_1stF              | ccaggagacaagcaggagaa                                         |
| XPC_1stR              | cgcggcagttcatctttcaa                                         |
| XPC_deepF             | ACACTCTTTCCTACACGAC GCTCTCCGATCT gtgagcaggaggaaaagtgg        |
| XPC_deepR             | GTGACTGGAGTTCAGACGTGT GCTCTCCGATCT gtatggtetcaaggtctcggc     |
| XPC_off_2nd_F1        | ACACTCTTTCCTACACGAC GCTCTCCGATCT CACATGCTCCTGGAAGGGAA        |
| XPC_off_2nd_R1        | GTGACTGGAGTTCAGACGTGT GCTCTCCGATCT AGGAGTGCCTACAGATGGGT      |
| XPC_off_2nd_F2        | ACACTCTTTCCTACACGAC GCTCTCCGATCT TTCACAGGCTGGCATTGAGT        |
| XPC_off_2nd_R2        | GTGACTGGAGTTCAGACGTGT GCTCTCCGATCT TGCCAGACAGAAGTTTGCT       |
| XPC_off_2nd_F3_NGG_F1 | ACACTCTTTCCTACACGAC GCTCTCCGATCT TGGAAGTGAAAGGGTTGTCT        |
| XPC_off_2nd_R3_NGG_R1 | GTGACTGGAGTTCAGACGTGT GCTCTCCGATCT TCCATCTTTCACAGAGCTTCCA    |
| XPC_off_2nd_F4        | ACACTCTTTCCTACACGAC GCTCTCCGATCT GCATTTCCAGGCACACAGTG        |
| XPC_off_2nd_R4        | GTGACTGGAGTTCAGACGTGT GCTCTCCGATCT CAGAGGATGCAAGGAAACACC     |
| XPC_off_2nd_F5        | ACACTCTTTCCTACACGAC GCTCTCCGATCT TCCATTTAGCTCGGGATGGC        |
| XPC_off_2nd_R5        | GTGACTGGAGTTCAGACGTGT GCTCTCCGATCT TGCCTCATTGTTTCATTAGTGTCT  |
| XPC_off_2nd_F6        | ACACTCTTTCCTACACGAC GCTCTCCGATCT AGTCATAATATTTCAAGGCAGAAAAGA |
| XPC_off_2nd_R6        | GTGACTGGAGTTCAGACGTGT GCTCTCCGATCT ACGCTCTTTTCAGACATTCTTGT   |
| XPC_off_2nd_F7        | ACACTCTTTCCTACACGAC GCTCTCCGATCT TGGCAGCAAGAGAAAGGAGG        |
| XPC_off_2nd_R7        | GTGACTGGAGTTCAGACGTGT GCTCTCCGATCT GTGACCTTCTCCTTCCGTG       |
| XPC_off_2nd_F8_NGG_F1 | ACACTCTTTCCTACACGAC GCTCTCCGATCT GACCTGTACTATGGGCTGCC        |
| XPC_off_2nd_R8_NGG_R1 | GTGACTGGAGTTCAGACGTGT GCTCTCCGATCT TCATCATCCCCTCCCTGTGT      |
| XPC_off_2nd_F9        | ACACTCTTTCCTACACGAC GCTCTCCGATCT ACCTCCCTCCTGAAGAAGTGA       |
| XPC_off_2nd_R9        | GTGACTGGAGTTCAGACGTGT GCTCTCCGATCT TGGGCAGGACTGATATCCCT      |
| XPC_off_2nd_F10       | ACACTCTTTCCTACACGAC GCTCTCCGATCT CCTCCTAAGGAACAACATGGTGT     |
| XPC_off_2nd_R10       | GTGACTGGAGTTCAGACGTGT GCTCTCCGATCT TGCAATTTCTTCTTGTCTGAGT    |
| XPC_off_1st_F1        | TGCAAACCCCTTCTGTCTGT                                         |
| XPC_off_1st_R1        | TGCAGTGAGCTGAGATTGGG                                         |
| XPC_off_1st_F2        | AATGGGGGTACAGGCATTGG                                         |
| XPC_off_1st_R2        | AGCTGGCTGCAGAAATTTGC                                         |
| XPC_off_1st_F3_NGG_F1 | GAGGTTGCAGTGAGCCAAGA                                         |
| XPC_off_1st_R3_NGG_R1 | GGAGGGAGAGAGGAGTGGAG                                         |
| XPC_off_1st_F4        | GCCTTCTCAACAATCCCCCA                                         |
| XPC_off_1st_R4        | CCACTGTTTTGTGCAGCCTC                                         |
| XPC_off_1st_F5        | TGAGGCGTGAAGTGTGTAC                                          |
| XPC_off_1st_R5        | TCAGCTCACTGCAACCTCTG                                         |
| XPC_off_1st_F6        | CTTACCAGCGGCTCTTGGAA                                         |
| XPC_off_1st_R6        | CATCTGCTAAAGGGCTGGCT                                         |
| XPC_off_1st_F7        | CCTCACAGCCAATCCCATGT                                         |
| XPC_off_1st_R7        | AGGAGTGGCTCATCAAAGGC                                         |
| XPC_off_1st_F8_NGG_F1 | ATGTGGACCCAGGCATTCTG                                         |

|                       |                      |
|-----------------------|----------------------|
| XPC_off_1st_R8_NGG_R1 | CAGAGGGAGCACCAAGGAAG |
| XPC_off_1st_F9        | GCAAGGGAGAAAGGAGGGTC |
| XPC_off_1st_R9        | CTCCTTCTTGTCGTGGGGAC |
| XPC_off_1st_F10       | TTCAAACCCCAAGGAAGTT  |
| XPC_off_1st_R10       | TCAGCCATACCACCAAGA   |

**Supplementary Table 6. List of off-target sites.**

| Name                          | On-target sequences     | Off-target sequences    | chr no. | position  | direction | no. of mismatches | sequence ID  | features                  |
|-------------------------------|-------------------------|-------------------------|---------|-----------|-----------|-------------------|--------------|---------------------------|
| XPC_ABE <sub>max</sub> _off_1 | GGGTCTGAGATGTCACACAGNGG | GGccCTGtGATGTCACACAGGGG | chr1    | 55008670  | -         | 3                 | NC_000001.11 | intergenic region         |
| XPC_ABE <sub>max</sub> _off_2 | GGGTCTGAGATGTCACACAGNGG | GGGcCTtAaATGTCACACAGAGG | chr1    | 199005822 | +         | 3                 | NC_000001.11 | intergenic region         |
| XPC_xABE_off_1                | GGGTCTGAGATGTCACACAGNG  | aGGTCTcAGATGTCACACAGCG  | chr7    | 24217661  | -         | 2                 | NC_000007.14 | intragenic region; intron |
| XPC_xABE_off_2                | GGGTCTGAGATGTCACACAGNG  | GGGTcAGAGcTGTCACACAGAG  | chr13   | 47873206  | -         | 2                 | NC_000013.11 | intergenic region         |
| XPC_xABE_off_3                | GGGTCTGAGATGTCACACAGNG  | GGGcCTtAaATGTCACACAGAG  | chr1    | 199005822 | +         | 3                 | NC_000001.11 | intergenic region         |
| XPC_xABE_off_4                | GGGTCTGAGATGTCACACAGNG  | GGGTtgGAGcTGTCACACAGAG  | chr2    | 102917030 | -         | 3                 | NC_000002.12 | intergenic region         |
| XPC_xABE_off_5                | GGGTCTGAGATGTCACACAGNG  | GaGTgTGAcATGTCACACAGAG  | chr17   | 48043863  | +         | 3                 | NC_000017.11 | intergenic region         |
| XPC_xABE_off_6                | GGGTCTGAGATGTCACACAGNG  | GGGTtgGAaATGTCACACAGAG  | chr6    | 148983560 | +         | 3                 | NC_000006.12 | intragenic region; intron |
| XPC_xABE_off_7                | GGGTCTGAGATGTCACACAGNG  | tGGTCTGgGcTGTCACACAGTG  | chr16   | 66513305  | -         | 3                 | NC_000016.10 | intragenic region; intron |
| XPC_xABE_off_8                | GGGTCTGAGATGTCACACAGNG  | GGccCTGtGATGTCACACAGGG  | chr1    | 55008671  | -         | 3                 | NC_000001.11 | intergenic region         |
| XPC_xABE_off_9                | GGGTCTGAGATGTCACACAGNG  | GGGTCTtgGtTGTCACACAGTG  | chr21   | 35580798  | +         | 3                 | NC_000021.9  | intergenic region         |
| XPC_xABE_off_10               | GGGTCTGAGATGTCACACAGNG  | GGcTCTGgcATGTCACACAGGG  | chr10   | 9927098   | +         | 3                 | NC_000010.11 | intergenic region         |
